# Supplementary material for: Carbonized loofah sponge-based solid-phase extraction of benzo[a]pyrene from fish followed by liquid chromatography-ultraviolet detection
Source: Royal Society of Chemistry journal article supplement (doi:10.1039/d3ay00442b), 2023-01-01
Supplement: d3ay00442b1.pdf [file d3ay00442b1.pdf]

# **Carbonized loofah sponge-based solid-phase extraction of benzo[a]pyrene from fish followed by liquid chromatography-ultraviolet detection**

Yaqi Zhu<sup>a,b</sup>, Saiyi Zhong<sup>b</sup>, Xitian Peng<sup>c,\*</sup>, Qiongwei Yu<sup>a,\*</sup>, Yuqi Feng<sup>a</sup>

*<sup>a</sup> Department of Chemistry, Wuhan University, Wuhan 430072, People's Republic of  
China*

*<sup>b</sup> Guangdong Provincial Key Laboratory of Aquatic Product Processing and Safety,  
Zhanjiang 524088, China*

*<sup>c</sup> Institute of Agricultural Quality Standards and Testing Technology Research, Hubei  
Academy of Agricultural Sciences/Hubei Key Laboratory of Nutritional Quality and  
Safety of Agro products, Wuhan 430064, Hubei, People's Republic of China*

\*Corresponding author:

Qiongwei Yu

E-mail: [qwyu@whu.edu.cn](mailto:qwyu@whu.edu.cn)

Xitian Peng

E-mail: [pxitian@aliyun.com](mailto:pxitian@aliyun.com)

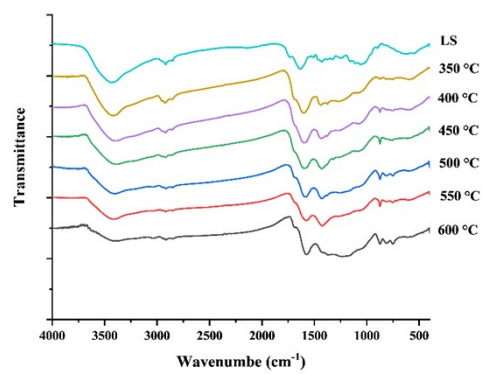

**Fig. S1** FTIR of LC and CLS at different carbonization temperatures (350°C, 400°C, 450°C, 500°C, 550°C and 600°C).

**Table S1** XPS and EDS of LS and CLS at different carbonization temperatures

|            |                   | LS   | 350°C | 400°C | 450°C | 500°C | 550°C | 600°C |
|------------|-------------------|------|-------|-------|-------|-------|-------|-------|
| <b>XPS</b> | <b>O/C Wt</b>     | 0.80 | 0.25  | 0.23  | 0.22  | 0.19  | 0.16  | 0.15  |
|            | <b>(O+N)/C Wt</b> | 0.84 | 0.27  | 0.25  | 0.23  | 0.21  | 0.18  | 0.17  |
| <b>EDS</b> | <b>O/C Wt</b>     | 0.80 | 0.27  | 0.21  | 0.20  | 0.17  | 0.13  | 0.10  |
|            | <b>(O+N)/C Wt</b> | 0.82 | 0.31  | 0.26  | 0.23  | 0.20  | 0.17  | 0.14  |

**Table S2** Specific surface area of LC and CLS at different carbonization temperatures

|                                               | LS   | 350°C | 400°C | 450°C | 500°C | 550°C | 600°C |
|-----------------------------------------------|------|-------|-------|-------|-------|-------|-------|
| <b>Specific Surface Area(m<sup>2</sup>/g)</b> | 0.24 | 2.97  | 5.82  | 7.81  | 8.52  | 9.72  | 11.21 |

**Table S3** Optimization of USE extraction times

| <b>Times</b>          | <b>1</b> | <b>2</b> | <b>3</b> |
|-----------------------|----------|----------|----------|
| <b>Recoveries (%)</b> | 108.6    | 109.1    | 105.3    |
| <b>RSDs (%)</b>       | 1.4      | 0.7      | 1.1      |

**Table S4** Recoveries and RSD under ten times of SPE cartridge reuse

| <b>Times</b>          | <b>1</b> | <b>2</b> | <b>3</b> | <b>4</b> | <b>5</b> | <b>6</b> | <b>7</b> | <b>8</b> | <b>9</b> | <b>10</b> | <b>RSD (%)</b> |
|-----------------------|----------|----------|----------|----------|----------|----------|----------|----------|----------|-----------|----------------|
| <b>Recoveries (%)</b> | 89.9     | 90.6     | 89.2     | 91.2     | 91.9     | 89.6     | 91.1     | 88.4     | 90.5     | 91.6      | 1.2            |

**Table S5** BaP content in fish skin, muscle, and skin-muscle mixture of cleaned crucian carp

|                    | <b>Skin</b> | <b>Muscle</b> | <b>Mixture</b> |
|--------------------|-------------|---------------|----------------|
| <b>Bap (ng/g)</b>  | 109.8       | 28.2          | 36.6           |
| <b>RSDs% (n=3)</b> | 0.8         | 3.4           | 2.6            |
